# Supplementary material for: Synthesis and properties of novel electroactive poly(amic acid) and polyimide copolymers bearing pendant oligoaniline groups
Source: Royal Society of Chemistry journal article supplement (doi:10.1039/c1py00035g), 2011-01-01
Supplement: c1py00035g.pdf [file c1py00035g.pdf]

## **Supplementary information**

**Figure S1.** FT-IR spectra of (a) PAA and (b) PI copolymers.

**Figure S2.** X-ray diffraction patterns of the PI copolymers.

**Table S1.** The solubility of the PAA copolymers in the different solvents.

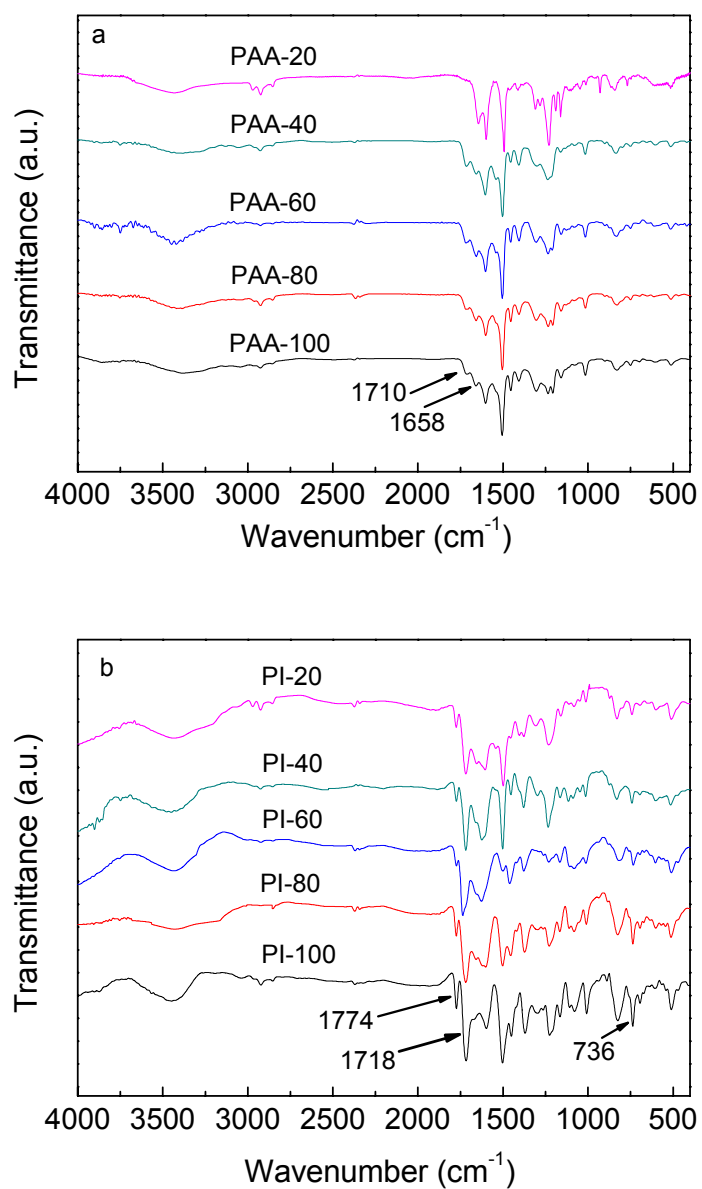

**Figure S1.**

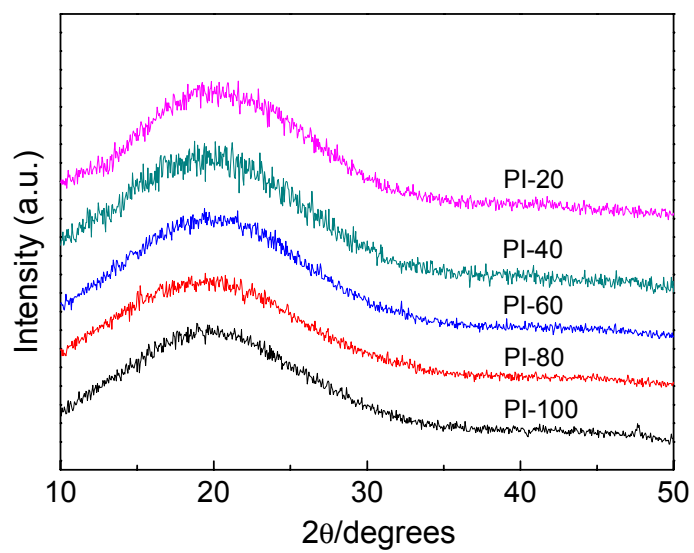

**Figure S2.**

|         | CH <sub>2</sub> Cl <sub>2</sub> | CHCl <sub>3</sub> | Acetone | THF | DMAc |
|---------|---------------------------------|-------------------|---------|-----|------|
| PAA-20  | -                               | +                 | -       | +   | +    |
| PAA-40  | -                               | + -               | -       | +   | +    |
| PAA-60  | -                               | -                 | + -     | +   | +    |
| PAA-80  | -                               | -                 | +       | +   | +    |
| PAA-100 | -                               | -                 | +       | +   | +    |

The solubility of the PAA-X was determined with 5% solid content at 25°C; + :soluble; +- :partially soluble; - :insoluble.

**Table S1.**
